# Supplementary material for: Mass spectrometry-based serum lipidomics strategy to explore the mechanism of Eleutherococcus senticosus (Rupr. & Maxim.) Maxim. leaves in the treatment of ischemic stroke
Source: Royal Society of Chemistry journal article supplement (doi:10.1039/d0fo02845b), 2021-01-01
Supplement: d0fo02845b1.pdf [file d0fo02845b1.pdf]

**Mass spectrometry-based serum lipidomics strategy to explore the  
mechanism of *Eleutherococcus senticosus* (Rupr. & Maxim.) Maxim.  
leaves in the treatment of ischemic stroke**

RongjinWang<sup>a</sup>, Shu Liu<sup>b</sup>, Tianshu Liu<sup>a</sup>, Jiajie Wu<sup>a</sup>, Hongxu Zhang<sup>a</sup>, Zhiheng Sun<sup>c</sup>,

Zhongying Liu<sup>a,\*</sup>

**Affiliation**

<sup>a</sup> *School of Pharmaceutical Sciences, Jilin University, Changchun130021, China*

<sup>b</sup> *National Center of Mass Spectrometry in Changchun & Jilin Provincial Key  
Laboratory of Chinese Medicine Chemistry and Mass Spectrometry, Changchun  
Institute of Applied Chemistry, Chinese Academy of Sciences, Changchun130022,  
China*

<sup>c</sup> *School of Chemistry, Jilin University, Changchun 130000, China*

\*Corresponding author

Zhongying Liu, School of Pharmaceutical Sciences, Jilin University, Changchun  
130021, China

Tel/Fax: +86-431-85619704

E-mail address: [liuzy@jlu.edu.cn](mailto:liuzy@jlu.edu.cn) (Z. Y. Liu)

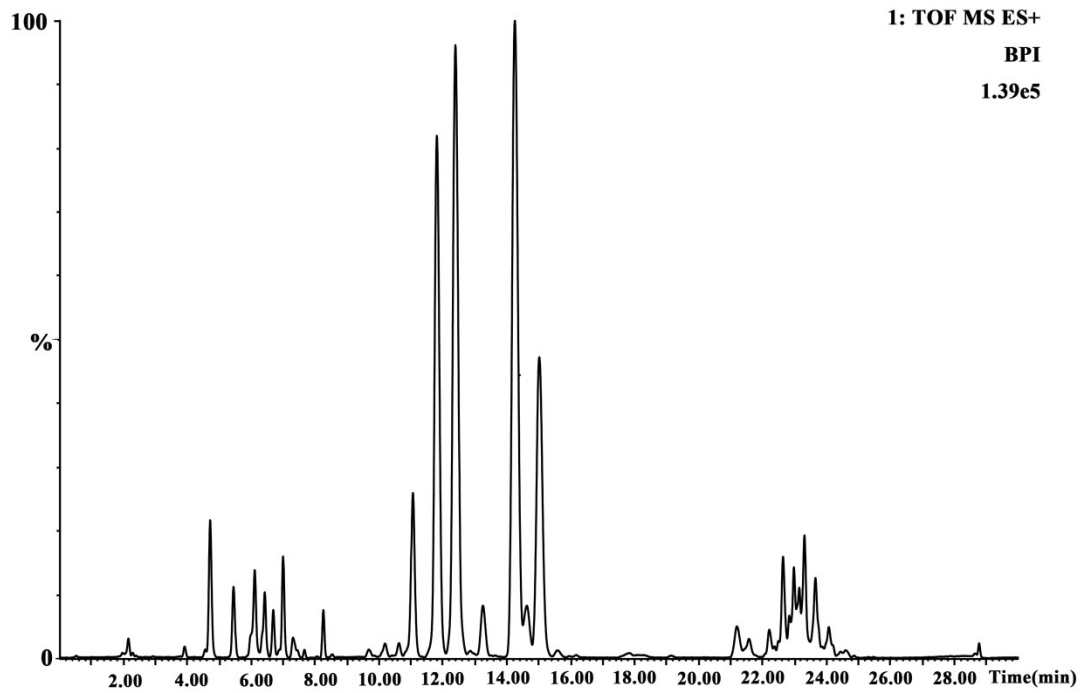

**Fig.S1** Base peak intensity chromatograms (BPI) obtained by UPLC-Q-TOF/MS analysis in positive mode.

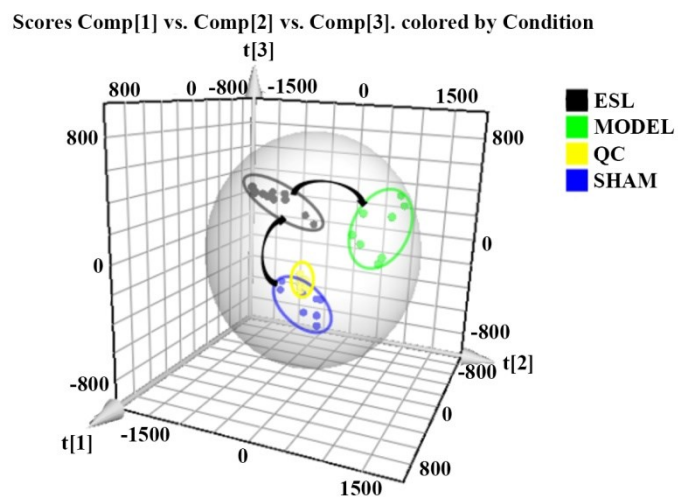

**Fig.S2** PCA 3D score plots of Sham-operated group, model group, ESL-treated group and QC group data in positive ion mode.

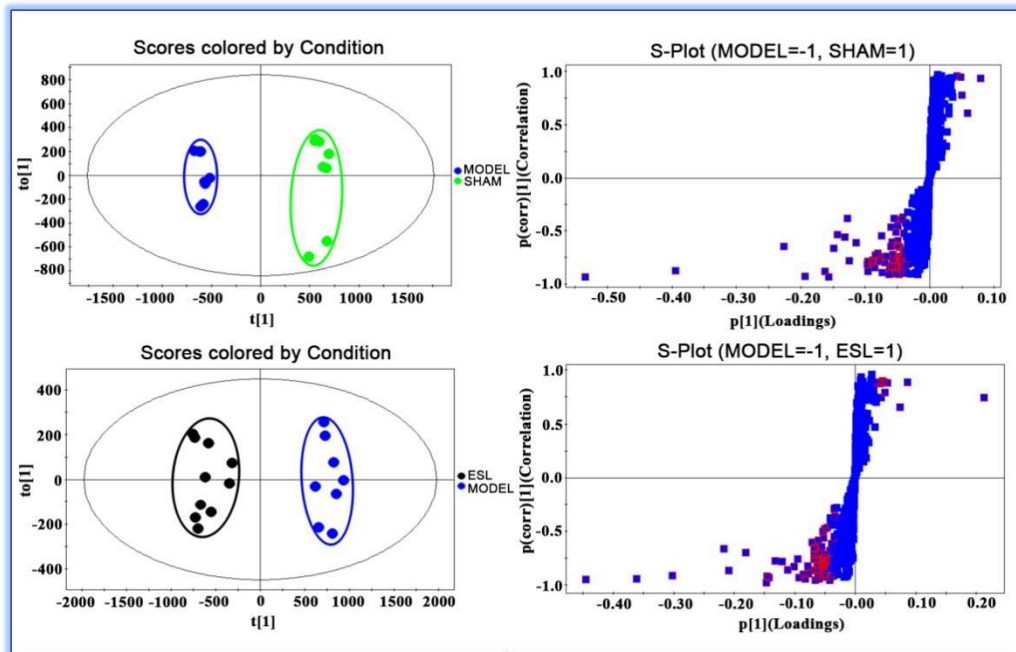

Fig .S3 OPLS-DA score plots and S-plots of serum lipidomics profiling between Sham-operated and modelgroup/ ESL-treated and modelgroup in positive ion mode.
